# Supplementary material for: Induction of E6AP by microRNA-302c dysregulation inhibits TGF-β-dependent fibrogenesis in hepatic stellate cells
Source: PubMed Central journal article supplement (PMC6965100; doi:10.1038/s41598-019-57322-w), 2020-01-16
Supplement: 41598_2019_57322_MOESM1_ESM.pdf [file 41598_2019_57322_MOESM1_ESM.pdf]

# Induction of E6AP by microRNA-302c dysregulation inhibits TGF- $\beta$ -dependent fibrogenesis in hepatic stellate cells

Ji Young Kim<sup>1,†</sup>, Kyu Min Kim<sup>1,†</sup>, Ji Hye Yang<sup>1,2</sup>, Sam Seok Cho<sup>1</sup>,  
Seung Jung Kim<sup>1</sup>, Su Jung Park<sup>1</sup>, Sang-Gun Ahn<sup>3</sup>, Gum Hwa Lee<sup>1</sup>,  
Jin Won Yang<sup>4</sup>, Sung Chul Lim<sup>5</sup>, Keon Wook Kang<sup>6</sup>, Sung Hwan Ki<sup>1\*</sup>

<sup>1</sup>College of Pharmacy, Chosun University, Gwangju 61452, Republic of Korea.

<sup>2</sup>College of Korean Medicine, Dongshin University, Naju, Jeollanam-do 58245, Republic of Korea

<sup>3</sup>Department of Pathology, College of Dentistry, Chosun University, Gwangju 61452, Republic of Korea.

<sup>4</sup>College of Pharmacy, Woosuk University, Wanju, Jeonbuk, 55338, Republic of Korea.

<sup>5</sup>College of Medicine, Chosun University, Gwangju 61452, Republic of Korea.

<sup>6</sup>College of Pharmacy and Research Institute of Pharmaceutical Sciences, Seoul National University, Seoul 08826, Republic of Korea.

B)

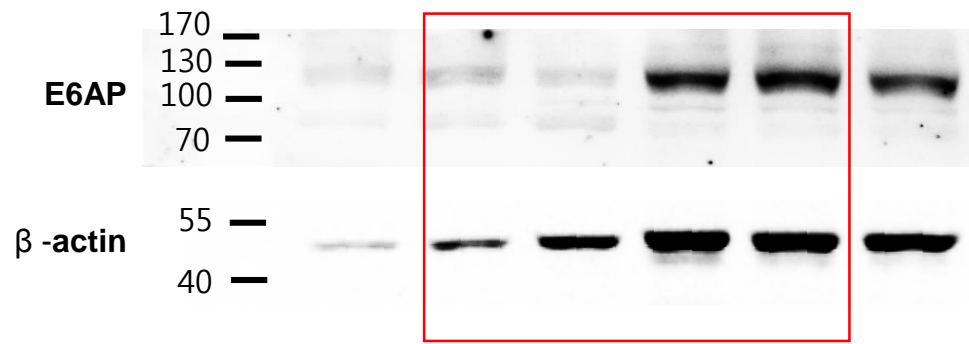

C)

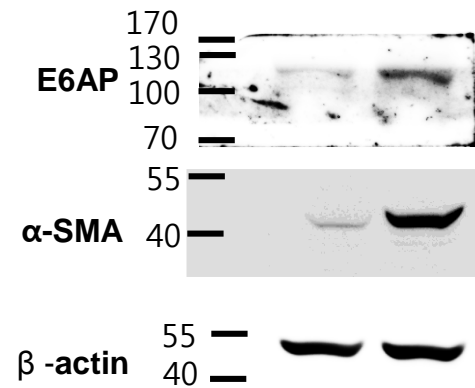

D)

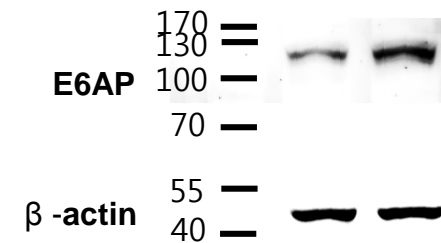

E)

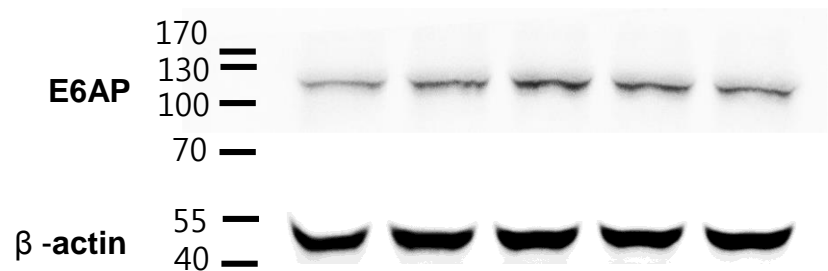

F)

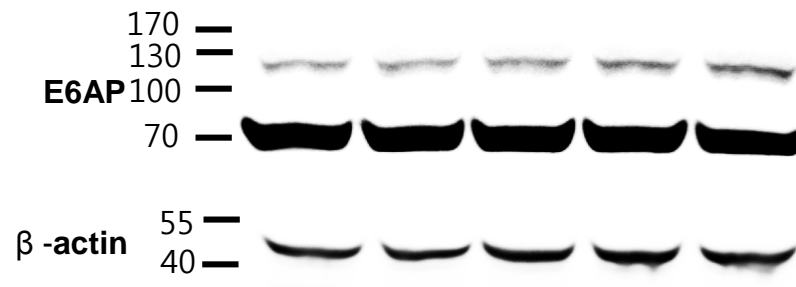

Supplementary Fig 1. Raw data of Figure 1

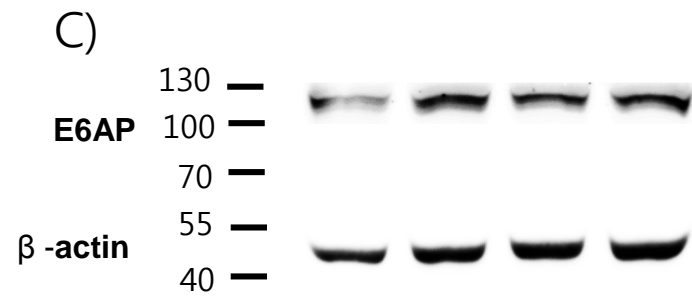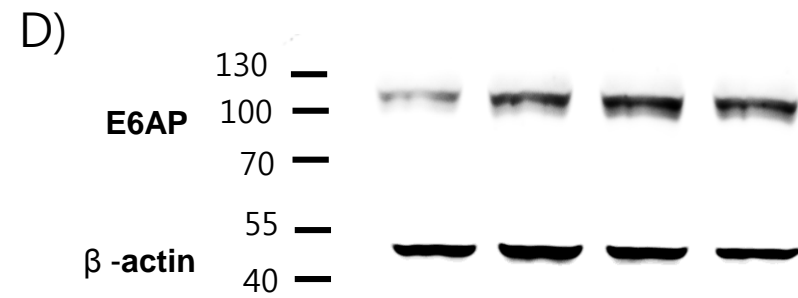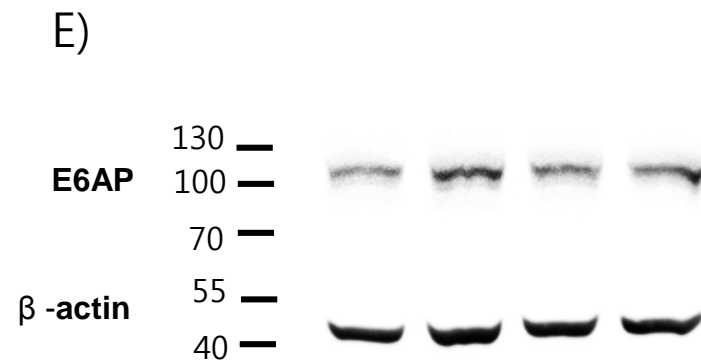

Supplementary Fig 2. Raw data of Figure 2

D)

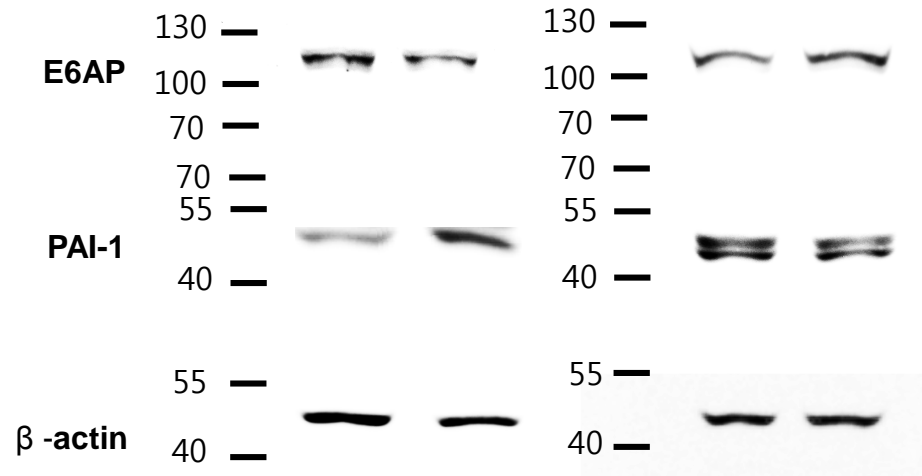

Supplementary Fig 3. Raw data of Figure 4

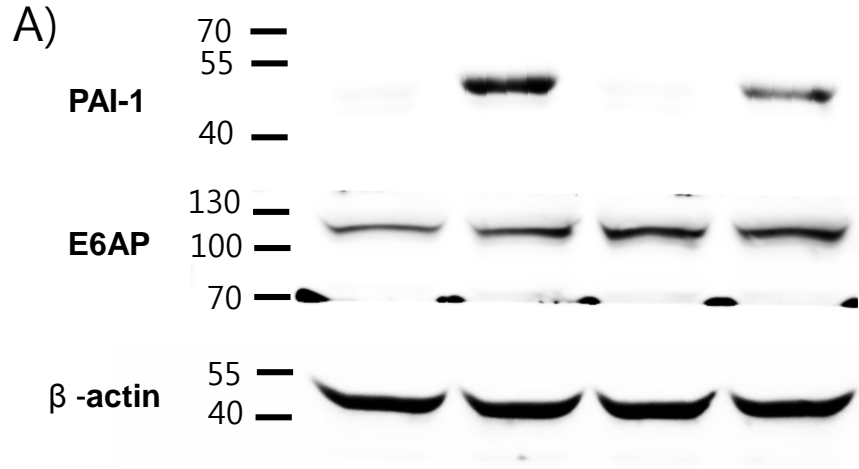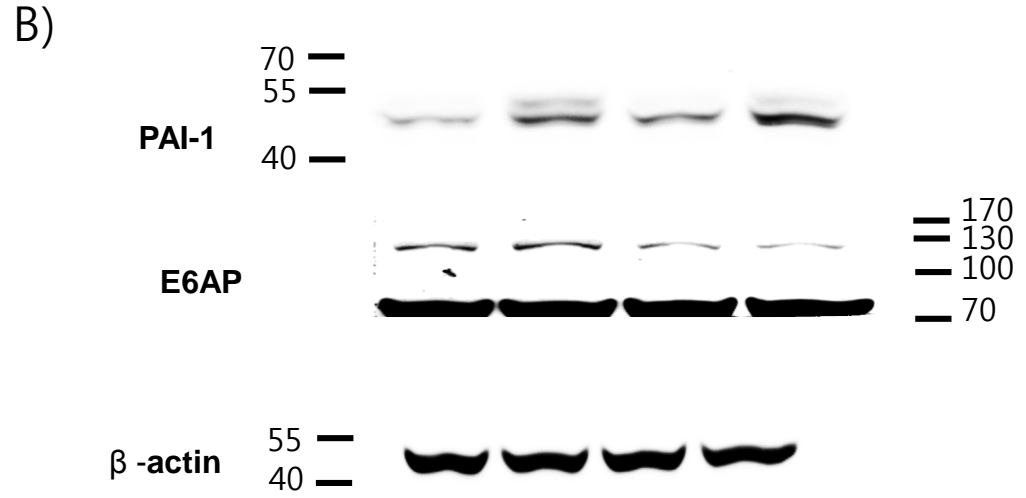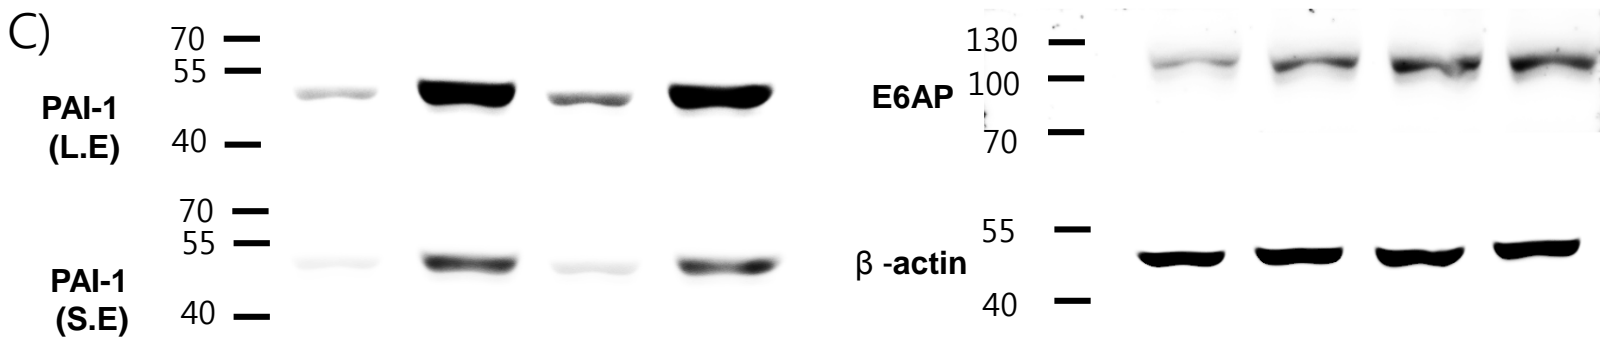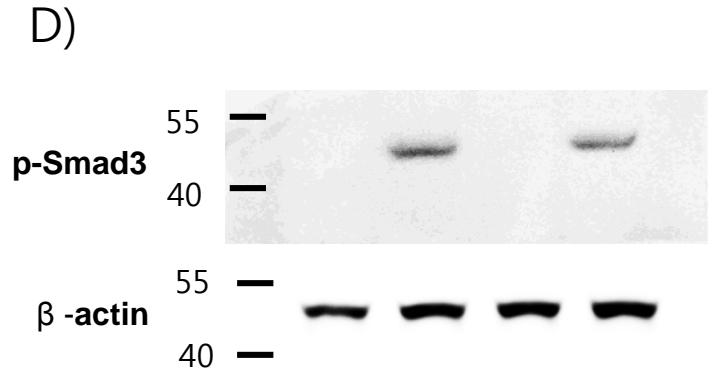

Supplementary Fig 4. Raw data of Figure 5

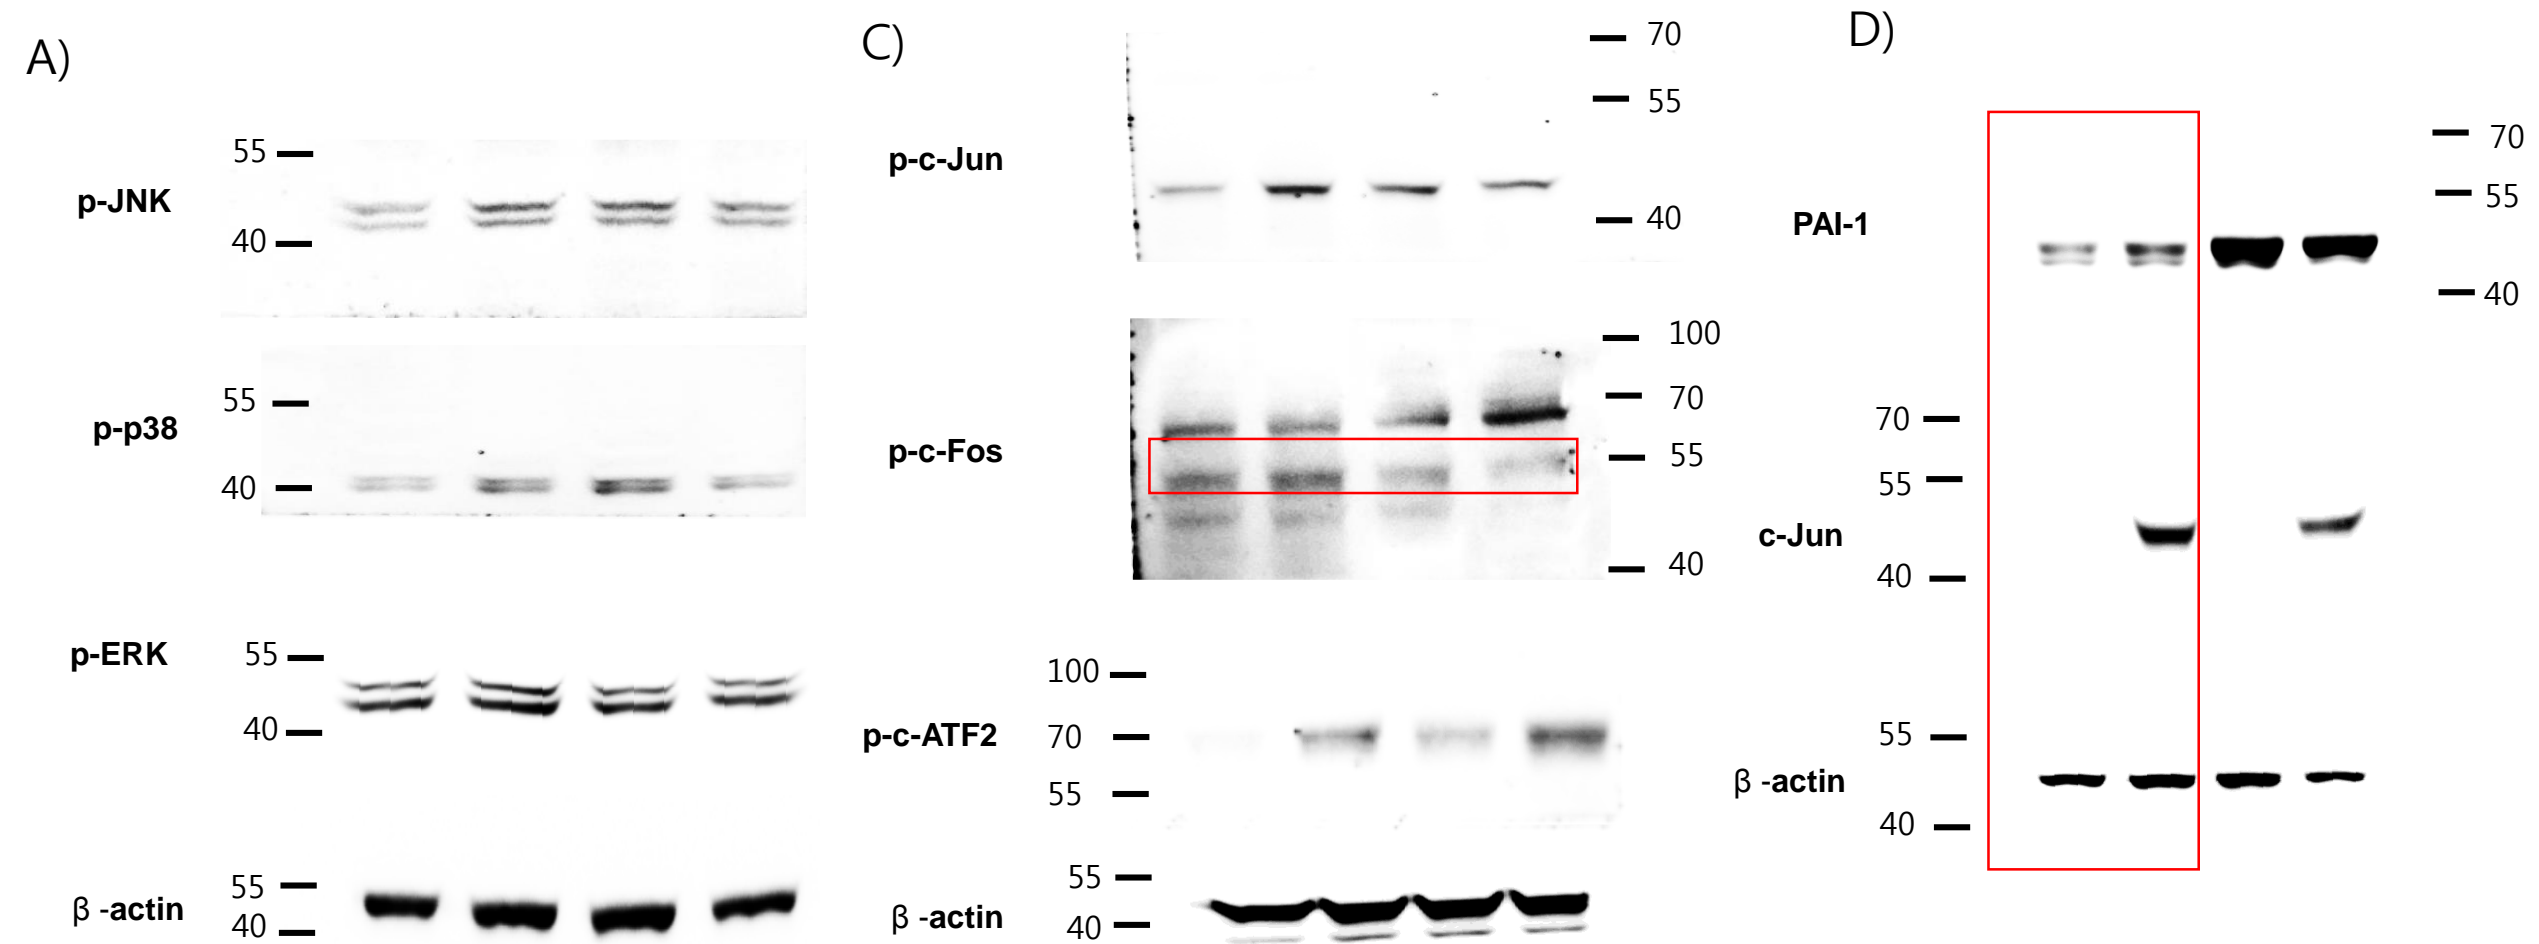

Supplementary Fig 5. Raw data of Figure 6
